# Supplementary material for: First detection of adiaspiromycosis in the lungs of a deer
Source: PubMed Central journal article supplement — J Vet Med Sci. 2015 Mar 15;77(8):981–3. doi: 10.1292/jvms.15-0083 (PMC4565823; doi:10.1292/jvms.15-0083), 2015-03-15
Supplement: jvms-77-981-s001.pdf [file jvms-77-981-s001.pdf]

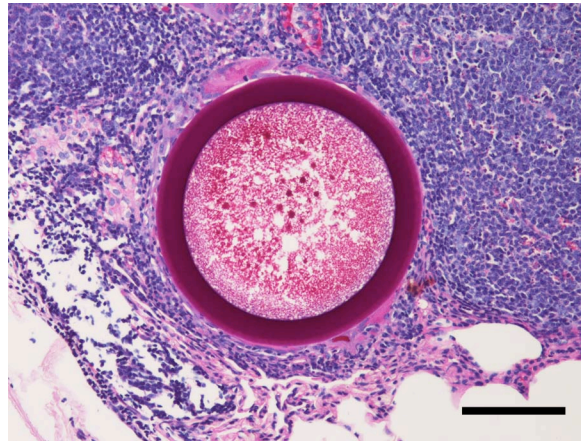

Supplementary Fig. 1. The wall of adiaspore is stained purple by periodic acid-Schiff reaction. Bar = 100  $\mu\text{m}$ .

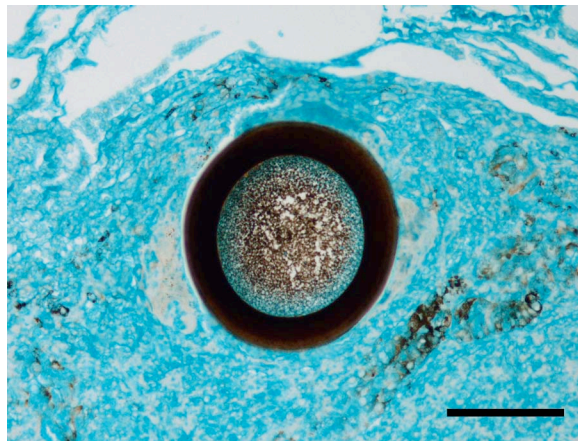

Supplementary Fig. 2. The wall of adiaspore is stained black by Grocott's methenamine silver stain. Bar = 100  $\mu\text{m}$ .
